# Supplementary material for: Quantification of Hydroxylated Polybrominated Diphenyl Ethers (OH-BDEs), Triclosan, and Related Compounds in Freshwater and Coastal Systems
Source: PLOS journal article supplement (doi:10.1371/journal.pone.0138805), 2015-10-14
Supplement: S6 (10.1371/journal.pone.0138805.s006) [file journal.pone.0138805.s006]

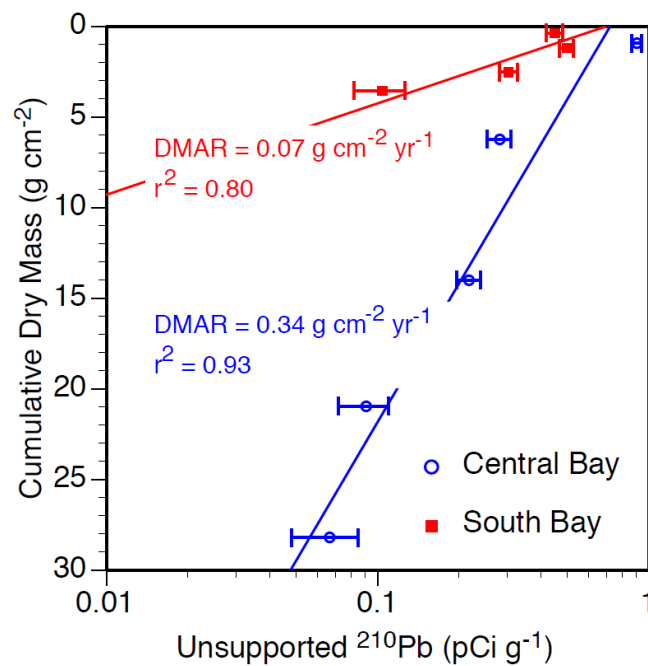

**S4 Figure.** An approximate chronology was determined for the San Francisco Bay cores by assuming a constant sediment flux (DMAR; dry mass accumulation rate) fitted to the data by least-squares regression (the cf:cs model).
